# Supplementary material
Source: publisher figshare collection journal article supplement (https://frontiersin.figshare.com/ndownloader/files/13520624)
Supplement: Supplementary file [file 13520624]

Additional Figure 2. Associations between human and microbial salivary RNA features

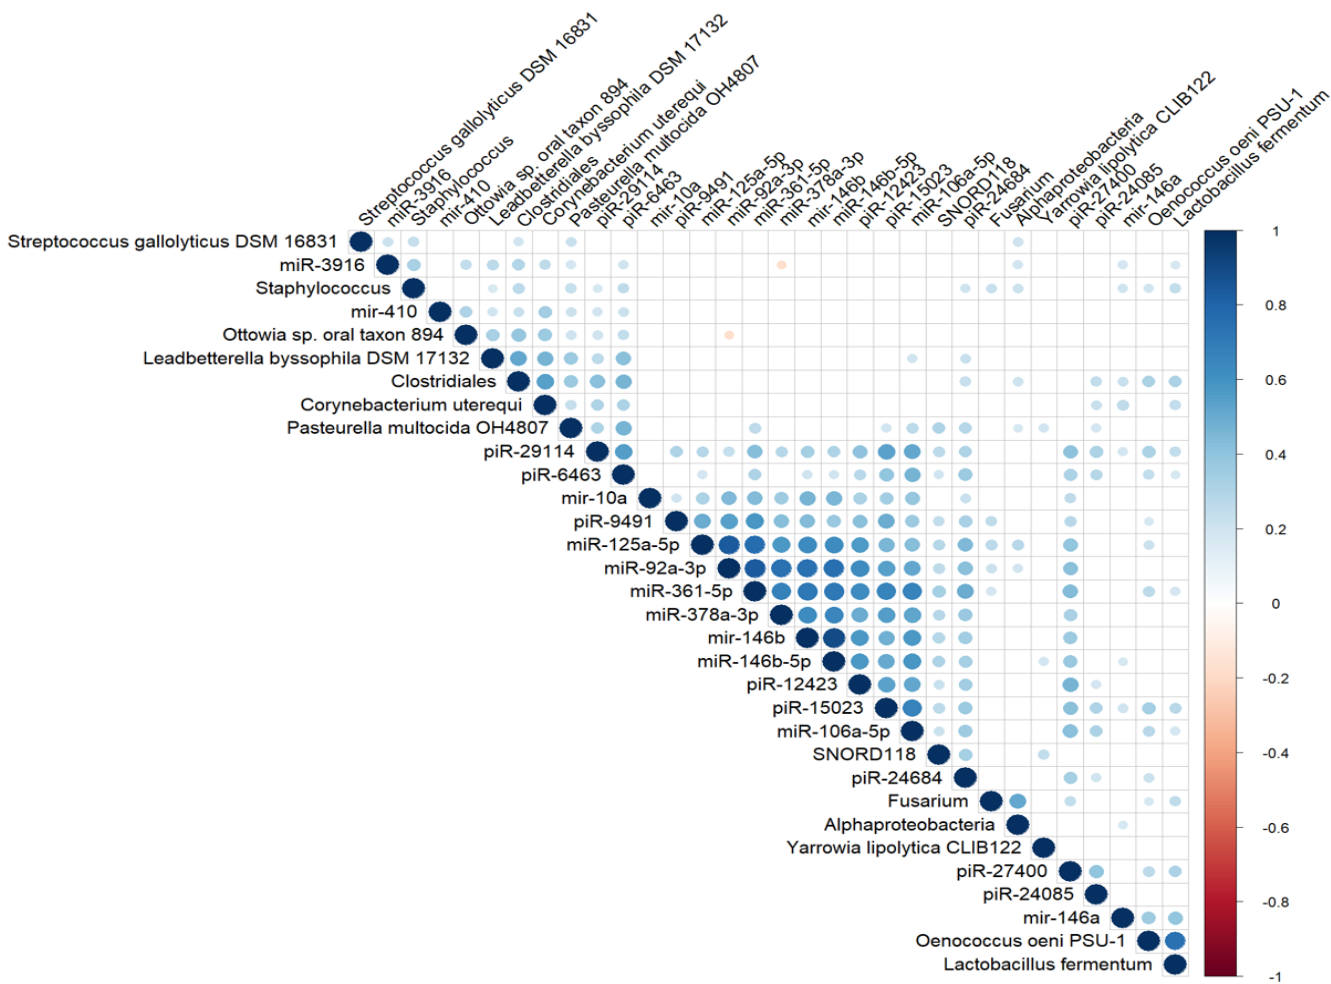

Relationships between microbial and human RNA feature abundance were determined for the 31 selected features with a Pearson correlation analysis. Features were hierarchically clustered based on strength of association. Strength of association is denoted by circle size and direction is noted by color (where blue represents direct and red represents indirect relationships). Only relationships with  $p < 0.01$  are shown.
